# Supplementary material
Source: publisher figshare collection journal article supplement (https://sage.figshare.com/ndownloader/files/13812089)
Supplement: Supplementary file 1 [file 13812089]

Additional material 1: Draft Medline and EMBASE search using OVID.

1. Intermittent claudication
2. Claudication
3. Peripheral artery disease
4. Arterial occlusive disease
5. Vascular disease
6. Peripheral arterial disease
7. Peripheral vascular disease
8. PAD
9. PAD-IC
10. PVD
11. 1 OR 2 OR 3 OR 4 OR 5 OR 6 OR 7 OR 8 OR 9 OR 10
12. Exercise Therapy
13. Exercise
14. Home-training
15. Home training
16. Home-based
17. Home based
18. Non-supervised exercise
19. Unsupervised exercise
20. Home-based exercise
21. Home based exercise
22. Home-based walking
23. Home based walking
24. Home-based exercise programme
25. Home based exercise programme
26. Home-based supported exercise
27. Home based supported exercise
28. Home-based exercise program
29. Home based exercise program
30. Community-based
31. Community based
32. Rehabilitation
33. Community walking programme
34. Community walking program
35. Walking therapy
36. Walking
37. 16 OR 17 OR 18 OR 19 OR 20 OR 21 OR 22 OR 23 OR 24 OR 25 OR 26 OR 27 OR 28 OR 29 OR 30 OR 31 OR 32 OR 33 OR 34 OR 35 OR 36
38. 15 AND 37
39. Remove duplicates from 38
